# Supplementary material for: Isolation, Identification and Characterization of a Novel Megalocytivirus from Cultured Tilapia (Oreochromis spp.) from Southern California, USA
Source: MDPI journal article supplement (doi:10.3390/ani11123524), 2021-12-10
Supplement: s1 [file s1]

# Supplementary Files:

**Supplementary Table S1.** Virus names, abbreviations, and GenBank accession numbers of the iridoviruses used in the phylogenetic analysis.

| Virus abbreviation      | Virus name                                                | GenBank Accession No.             |
|-------------------------|-----------------------------------------------------------|-----------------------------------|
| FV3                     | Frog virus 3                                              | AY548484                          |
| BIV                     | Bohle iridovirus                                          | KX185156                          |
| ATV                     | Ambystoma tigrinum virus                                  | AY150217                          |
| ESV                     | European sheatfish virus                                  | JQ724856                          |
| CMTV-E                  | Common midwife toad virus                                 | JQ231222                          |
| SGIV                    | Singapore grouper iridovirus                              | AY521625                          |
| GIV                     | Grouper iridovirus                                        | AY666015                          |
| ADRV                    | Andrias davidianus ranavirus                              | KC865735                          |
| ECV                     | European catfish virus                                    | KT989885                          |
| SERV                    | Short-finned eel ranavirus                                | KX353311                          |
| Rmax                    | Ranavirus maximus                                         | KX574343                          |
| CoIV                    | Cod iridovirus                                            | KX574342                          |
| LCDV-WC                 | Lymphocystis disease virus 4                              | MN803438                          |
| LCDV-Sa                 | Lymphocystis disease virus-Sparus aurata                  | KX643370                          |
| LCDV-C                  | Lymphocystis disease virus-China                          | AY380826                          |
| LCDV-1                  | lymphocystis disease virus 1                              | L63545                            |
| ISKNV                   | Infectious spleen and kidney necrosis virus               | AF371960                          |
| AFIV-16                 | Angelfish iridovirus AFIV-16                              | MK689685                          |
| RSIV                    | Red seabream iridovirus                                   | AB104413                          |
| LYCIV                   | Large yellow croaker iridovirus                           | AY779031                          |
| RBIV                    | Rock bream iridovirus                                     | AY532606                          |
| OSGIV                   | Orange-spotted grouper iridovirus                         | AY894343                          |
| GSIV-K1                 | Giant seaperch iridovirus isolate                         | KT804738                          |
| SACIV                   | South American cichlid iridovirus                         | MG570131                          |
| TSGIV                   | Three spot gourami iridovirus                             | MG570132                          |
| TRBIV                   | Turbot reddish body iridovirus                            | GQ273492                          |
| TSIV                    | Threespine stickleback iridovirus                         | HQ857785 (MCP)<br>HQ857784 (Dpol) |
| SDDV-C4575              | Scale drop disease virus                                  | KR139659                          |
| SDDV-GF MUI             | Scale drop disease virus isolate GF_MU1                   | MT521409                          |
| SDDV-Thai2019           | Scale drop disease virus isolate SDDV_Thai_2019           | MN562489                          |
| Tilapia megalocytivirus | Tilapia megalocytivirus                                   | OL014471 (MCP)<br>OL014472 (Dpol) |
| ECIV                    | European chub iridovirus                                  | MK637631                          |
| IIV-22                  | Invertebrate iridescent virus 22                          | HF920633                          |
| IIV-22a                 | Invertebrate iridescent virus 22 isolate IIV22Aberystwyth | HF920634                          |
| IIV-30                  | Invertebrate iridescent virus 30                          | HF920636                          |
| IIV-25                  | Invertebrate iridescent virus 25                          | HF920635                          |
| IIV-9                   | Invertebrate iridescent virus 9                           | GQ918152                          |
| IIV-3                   | Invertebrate iridescent virus 3                           | DQ643392                          |

|        |                                  |          |
|--------|----------------------------------|----------|
| AMIV   | Anopheles minimus iridovirus     | KF938901 |
| DIV-1  | Daphnia iridescent virus 1       | LS484712 |
| IIV-6  | Invertebrate iridescent virus 6  | AF303741 |
| IIV-31 | Invertebrate iridescent virus 31 | HF920637 |
| SHIV   | Shrimp hemocyte iridescent virus | MF599468 |

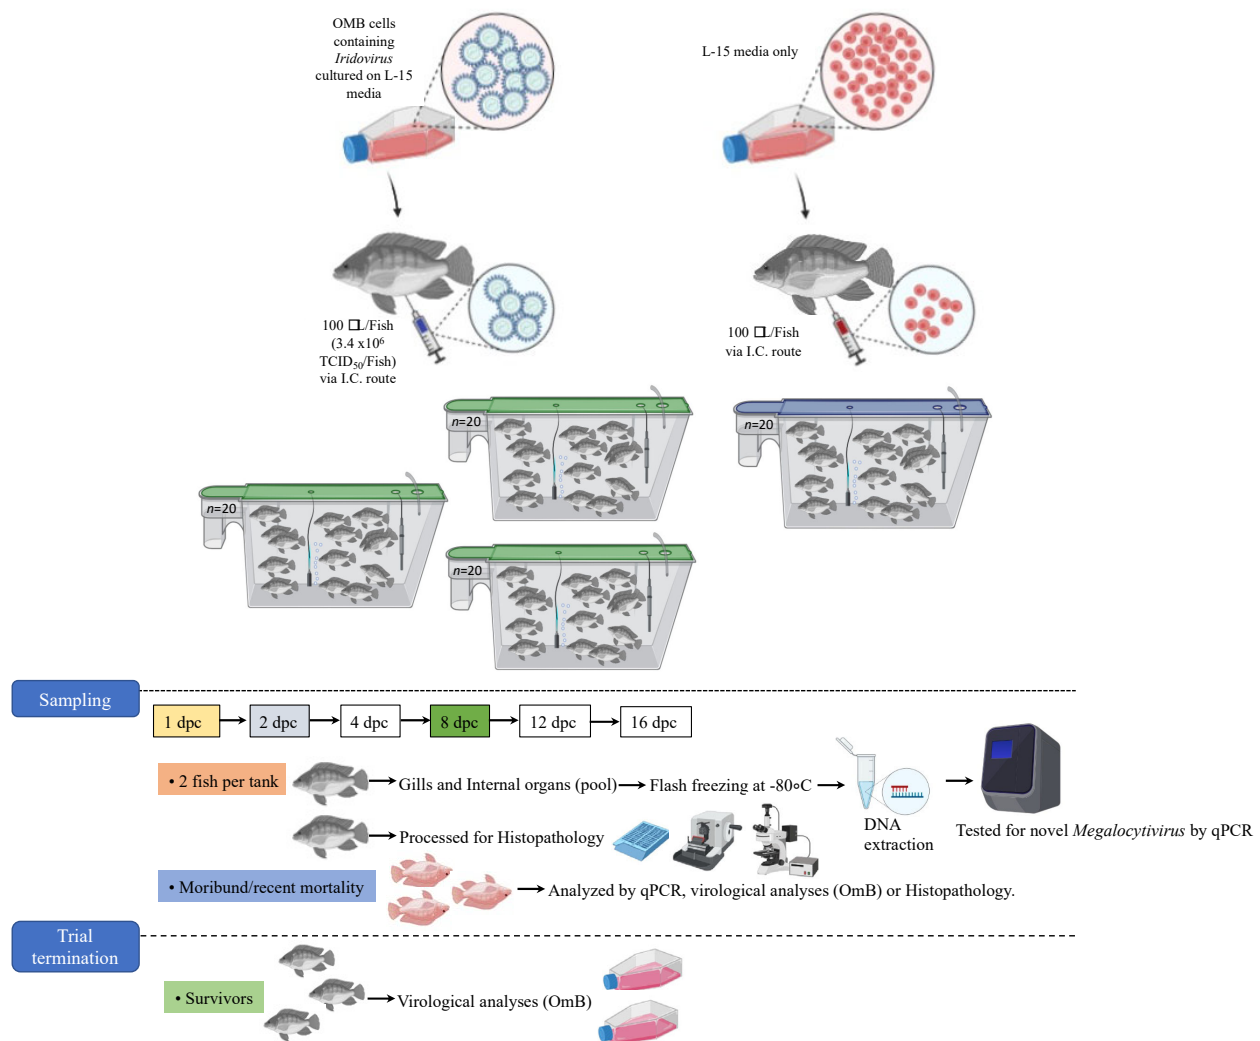

**Supplementary Figure S1.** Schematic diagram of experimental challenge of Nile tilapia with the novel megalocytivirus.

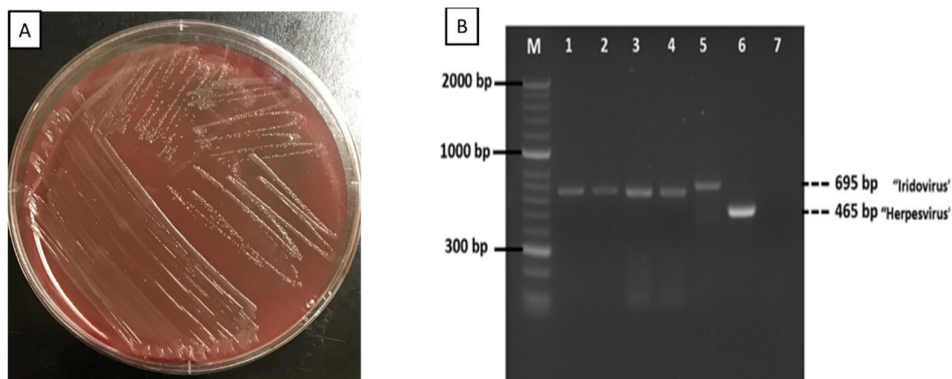

**Supplementary Figure S2.** (A) *Francisella orientalis* colonies recovered from diseased tilapia on MTM plates after 96 h incubation at 25°C. (B) Agarose gel showing PCR amplification of a DNA polymerase gene of an appropriate size consistent with an iridovirus. The novel megalocytivirus was isolated in an OmB cell line from three diseased Nile tilapia in Southern CA, USA. PCR amplification used primers designed by Hanson et al. [25] M: 1KB plus DNA marker, 1-4: novel megalocytivirus isolates from fish 1 (Lane 1), 2 (Lane 2) and 5 (lanes 3 and 4), 5: Frog virus 3 (*Ranavirus*), 6: Koi Herpesvirus (*Herpesvirus*), 7: negative control (Milli-Q water only).
